# Supplementary material
Source: PubMed Central journal article supplement (PMC6865744)
Supplement: HBM-40-2241-s006.pdf [file HBM-40-2241-s006.pdf]

## Corr. w/ age

| <b>ROI A</b> | <b>ROI B</b> | <b><i>r</i></b> | <b><i>p</i></b> |
|--------------|--------------|-----------------|-----------------|
| NAc_L        | A1_L         | 0.09            | 0.41            |
| NAc_L        | A1_R         | -0.07           | 0.53            |
| NAc_L        | pgACC_L      | 0.02            | 0.84            |
| NAc_L        | pgACC_R      | -0.05           | 0.61            |
| NAc_L        | sgACC_L      | 0.11            | 0.32            |
| NAc_L        | sgACC_R      | 0.03            | 0.81            |
| NAc_L        | PHC_L        | -0.03           | 0.76            |
| NAc_L        | PHC_R        | 0.09            | 0.43            |
| NAc_L        | Amyg_L       | 0.09            | 0.38            |
| NAc_L        | Amyg_R       | -0.08           | 0.46            |
| NAc_L        | vmPFC_L      | -0.11           | 0.32            |
| NAc_L        | vmPFC_R      | -0.03           | 0.76            |
| NAc_R        | A1_L         | 0.13            | 0.21            |
| NAc_R        | A1_R         | -0.02           | 0.83            |
| NAc_R        | pgACC_L      | 0.01            | 0.96            |
| NAc_R        | pgACC_R      | -0.15           | 0.16            |
| NAc_R        | sgACC_L      | -0.17           | 0.10            |
| NAc_R        | sgACC_R      | -0.11           | 0.28            |
| NAc_R        | PHC_L        | -0.07           | 0.50            |
| NAc_R        | PHC_R        | 0.00            | 0.99            |
| NAc_R        | Amyg_L       | 0.13            | 0.24            |
| NAc_R        | Amyg_R       | 0.09            | 0.42            |
| NAc_R        | vmPFC_L      | -0.25           | 0.02            |
| NAc_R        | vmPFC_R      | -0.24           | 0.02            |

## Corr. w/ mean hearing loss

| <b>ROI A</b> | <b>ROI B</b> | <b><i>r</i></b> | <b><i>p</i></b> |
|--------------|--------------|-----------------|-----------------|
| NAc_L        | A1_L         | 0.10            | 0.34            |
| NAc_L        | A1_R         | 0.06            | 0.58            |
| NAc_L        | pgACC_L      | 0.03            | 0.76            |
| NAc_L        | pgACC_R      | -0.08           | 0.44            |
| NAc_L        | sgACC_L      | -0.03           | 0.81            |
| NAc_L        | sgACC_R      | 0.10            | 0.35            |
| NAc_L        | PHC_L        | 0.04            | 0.73            |
| NAc_L        | PHC_R        | 0.10            | 0.33            |
| NAc_L        | Amyg_L       | 0.10            | 0.36            |
| NAc_L        | Amyg_R       | 0.12            | 0.24            |
| NAc_L        | vmPFC_L      | -0.05           | 0.62            |
| NAc_L        | vmPFC_R      | -0.10           | 0.33            |
| NAc_R        | A1_L         | -0.01           | 0.93            |
| NAc_R        | A1_R         | 0.10            | 0.34            |
| NAc_R        | pgACC_L      | -0.20           | 0.06            |
| NAc_R        | pgACC_R      | -0.15           | 0.16            |
| NAc_R        | sgACC_L      | -0.03           | 0.77            |
| NAc_R        | sgACC_R      | -0.13           | 0.23            |
| NAc_R        | PHC_L        | -0.06           | 0.60            |
| NAc_R        | PHC_R        | 0.00            | 0.98            |
| NAc_R        | Amyg_L       | 0.03            | 0.79            |
| NAc_R        | Amyg_R       | 0.08            | 0.46            |
| NAc_R        | vmPFC_L      | -0.15           | 0.16            |
| NAc_R        | vmPFC_R      | -0.29           | 0.01            |

## Corr. w/ tinnitus-related distress (TQ)

| <b>ROI A</b> | <b>ROI B</b> | <b><i>r</i></b> | <b><i>p</i></b> |
|--------------|--------------|-----------------|-----------------|
| NAc_L        | A1_L         | 0.09            | 0.39            |
| NAc_L        | A1_R         | -0.15           | 0.16            |
| NAc_L        | pgACC_L      | -0.08           | 0.43            |
| NAc_L        | pgACC_R      | -0.16           | 0.13            |
| NAc_L        | sgACC_L      | -0.12           | 0.25            |
| NAc_L        | sgACC_R      | -0.07           | 0.51            |
| NAc_L        | PHC_L        | 0.04            | 0.69            |
| NAc_L        | PHC_R        | 0.03            | 0.81            |
| NAc_L        | Amyg_L       | -0.06           | 0.61            |
| NAc_L        | Amyg_R       | 0.01            | 0.94            |
| NAc_L        | vmPFC_L      | -0.16           | 0.14            |
| NAc_L        | vmPFC_R      | -0.20           | 0.06            |
| NAc_R        | A1_L         | 0.02            | 0.88            |
| NAc_R        | A1_R         | -0.01           | 0.90            |
| NAc_R        | pgACC_L      | -0.02           | 0.84            |
| NAc_R        | pgACC_R      | -0.06           | 0.59            |
| NAc_R        | sgACC_L      | -0.17           | 0.11            |
| NAc_R        | sgACC_R      | 0.08            | 0.47            |
| NAc_R        | PHC_L        | 0.11            | 0.32            |
| NAc_R        | PHC_R        | 0.15            | 0.15            |
| NAc_R        | Amyg_L       | -0.01           | 0.96            |
| NAc_R        | Amyg_R       | -0.03           | 0.79            |
| NAc_R        | vmPFC_L      | -0.12           | 0.26            |
| NAc_R        | vmPFC_R      | -0.10           | 0.34            |

## Corr. w/ tinnitus loudness (0-10 NRS)

| <b>ROI A</b> | <b>ROI B</b> | <b><i>r</i></b> | <b><i>p</i></b> |
|--------------|--------------|-----------------|-----------------|
| NAc_L        | A1_L         | -0.03           | 0.75            |
| NAc_L        | A1_R         | -0.07           | 0.51            |
| NAc_L        | pgACC_L      | -0.04           | 0.74            |
| NAc_L        | pgACC_R      | -0.10           | 0.36            |
| NAc_L        | sgACC_L      | -0.06           | 0.59            |
| NAc_L        | sgACC_R      | -0.06           | 0.58            |
| NAc_L        | PHC_L        | 0.36            | 0.00            |
| NAc_L        | PHC_R        | 0.01            | 0.90            |
| NAc_L        | Amyg_L       | 0.07            | 0.49            |
| NAc_L        | Amyg_R       | 0.04            | 0.69            |
| NAc_L        | vmPFC_L      | 0.06            | 0.55            |
| NAc_L        | vmPFC_R      | -0.16           | 0.13            |
| NAc_R        | A1_L         | -0.12           | 0.27            |
| NAc_R        | A1_R         | -0.08           | 0.43            |
| NAc_R        | pgACC_L      | -0.15           | 0.16            |
| NAc_R        | pgACC_R      | -0.05           | 0.61            |
| NAc_R        | sgACC_L      | -0.10           | 0.33            |
| NAc_R        | sgACC_R      | -0.04           | 0.69            |
| NAc_R        | PHC_L        | 0.09            | 0.41            |
| NAc_R        | PHC_R        | -0.04           | 0.69            |
| NAc_R        | Amyg_L       | -0.05           | 0.64            |
| NAc_R        | Amyg_R       | 0.01            | 0.94            |
| NAc_R        | vmPFC_L      | -0.06           | 0.60            |
| NAc_R        | vmPFC_R      | -0.26           | 0.02            |

## Corr. w/ duration of tinnitus symptoms

| <b>ROI A</b> | <b>ROI B</b> | <b><i>r</i></b> | <b><i>p</i></b> |
|--------------|--------------|-----------------|-----------------|
| NAc_L        | A1_L         | 0.04            | 0.72            |
| NAc_L        | A1_R         | 0.19            | 0.07            |
| NAc_L        | pgACC_L      | -0.09           | 0.40            |
| NAc_L        | pgACC_R      | 0.02            | 0.88            |
| NAc_L        | sgACC_L      | 0.05            | 0.65            |
| NAc_L        | sgACC_R      | -0.03           | 0.80            |
| NAc_L        | PHC_L        | 0.25            | 0.02            |
| NAc_L        | PHC_R        | 0.05            | 0.67            |
| NAc_L        | Amyg_L       | 0.00            | 1.00            |
| NAc_L        | Amyg_R       | 0.14            | 0.20            |
| NAc_L        | vmPFC_L      | 0.09            | 0.38            |
| NAc_L        | vmPFC_R      | 0.12            | 0.27            |
| NAc_R        | A1_L         | -0.11           | 0.31            |
| NAc_R        | A1_R         | 0.15            | 0.16            |
| NAc_R        | pgACC_L      | -0.21           | 0.05            |
| NAc_R        | pgACC_R      | -0.02           | 0.84            |
| NAc_R        | sgACC_L      | 0.10            | 0.34            |
| NAc_R        | sgACC_R      | -0.07           | 0.51            |
| NAc_R        | PHC_L        | 0.01            | 0.92            |
| NAc_R        | PHC_R        | 0.14            | 0.19            |
| NAc_R        | Amyg_L       | -0.01           | 0.91            |
| NAc_R        | Amyg_R       | 0.19            | 0.07            |
| NAc_R        | vmPFC_L      | 0.16            | 0.13            |
| NAc_R        | vmPFC_R      | 0.04            | 0.69            |

Partial corr. w/ TQ

| <b>ROI A</b> | <b>ROI B</b> | <b><i>r_partial</i></b> | <b><i>p</i></b> |
|--------------|--------------|-------------------------|-----------------|
| NAc_L        | A1_L         | 0.07                    | 0.55            |
| NAc_L        | A1_R         | -0.21                   | 0.05            |
| NAc_L        | pgACC_L      | -0.10                   | 0.33            |
| NAc_L        | pgACC_R      | -0.15                   | 0.18            |
| NAc_L        | sgACC_L      | -0.10                   | 0.34            |
| NAc_L        | sgACC_R      | -0.12                   | 0.25            |
| NAc_L        | PHC_L        | 0.02                    | 0.84            |
| NAc_L        | PHC_R        | -0.01                   | 0.93            |
| NAc_L        | Amyg_L       | -0.09                   | 0.39            |
| NAc_L        | Amyg_R       | -0.07                   | 0.50            |
| NAc_L        | vmPFC_L      | -0.16                   | 0.13            |
| NAc_L        | vmPFC_R      | -0.17                   | 0.10            |
| NAc_R        | A1_L         | 0.05                    | 0.65            |
| NAc_R        | A1_R         | -0.07                   | 0.50            |
| NAc_R        | pgACC_L      | 0.08                    | 0.45            |
| NAc_R        | pgACC_R      | -0.01                   | 0.89            |
| NAc_R        | sgACC_L      | -0.21                   | 0.05            |
| NAc_R        | sgACC_R      | 0.13                    | 0.23            |
| NAc_R        | PHC_L        | 0.13                    | 0.22            |
| NAc_R        | PHC_R        | 0.17                    | 0.12            |
| NAc_R        | Amyg_L       | 0.00                    | 0.98            |
| NAc_R        | Amyg_R       | -0.05                   | 0.61            |
| NAc_R        | vmPFC_L      | -0.11                   | 0.32            |
| NAc_R        | vmPFC_R      | -0.01                   | 0.93            |

## Partial corr. w/ NRS

| <b>ROI A</b> | <b>ROI B</b> | <b><i>r_partial</i></b> | <b><i>p</i></b> |
|--------------|--------------|-------------------------|-----------------|
| NAc_L        | A1_L         | -0.08                   | 0.48            |
| NAc_L        | A1_R         | -0.10                   | 0.33            |
| NAc_L        | pgACC_L      | -0.05                   | 0.64            |
| NAc_L        | pgACC_R      | -0.07                   | 0.50            |
| NAc_L        | sgACC_L      | -0.05                   | 0.65            |
| NAc_L        | sgACC_R      | -0.11                   | 0.33            |
| NAc_L        | PHC_L        | 0.37                    | 0.00            |
| NAc_L        | PHC_R        | -0.03                   | 0.80            |
| NAc_L        | Amyg_L       | 0.04                    | 0.70            |
| NAc_L        | Amyg_R       | -0.01                   | 0.93            |
| NAc_L        | vmPFC_L      | 0.09                    | 0.42            |
| NAc_L        | vmPFC_R      | -0.13                   | 0.23            |
| NAc_R        | A1_L         | -0.12                   | 0.27            |
| NAc_R        | A1_R         | -0.14                   | 0.21            |
| NAc_R        | pgACC_L      | -0.08                   | 0.47            |
| NAc_R        | pgACC_R      | 0.00                    | 1.00            |
| NAc_R        | sgACC_L      | -0.11                   | 0.32            |
| NAc_R        | sgACC_R      | 0.00                    | 0.98            |
| NAc_R        | PHC_L        | 0.12                    | 0.28            |
| NAc_R        | PHC_R        | -0.05                   | 0.67            |
| NAc_R        | Amyg_L       | -0.06                   | 0.56            |
| NAc_R        | Amyg_R       | -0.02                   | 0.84            |
| NAc_R        | vmPFC_L      | -0.01                   | 0.96            |
| NAc_R        | vmPFC_R      | -0.17                   | 0.11            |

## Partial corr. w/ duration

| <b>ROI A</b> | <b>ROI B</b> | <b><i>r_partial</i></b> | <b><i>p</i></b> |
|--------------|--------------|-------------------------|-----------------|
| NAc_L        | A1_L         | 0.01                    | 0.93            |
| NAc_L        | A1_R         | 0.18                    | 0.09            |
| NAc_L        | pgACC_L      | -0.10                   | 0.34            |
| NAc_L        | pgACC_R      | 0.04                    | 0.71            |
| NAc_L        | sgACC_L      | 0.06                    | 0.58            |
| NAc_L        | sgACC_R      | -0.06                   | 0.60            |
| NAc_L        | PHC_L        | 0.25                    | 0.02            |
| NAc_L        | PHC_R        | 0.02                    | 0.87            |
| NAc_L        | Amyg_L       | -0.03                   | 0.79            |
| NAc_L        | Amyg_R       | 0.11                    | 0.32            |
| NAc_L        | vmPFC_L      | 0.11                    | 0.29            |
| NAc_L        | vmPFC_R      | 0.15                    | 0.15            |
| NAc_R        | A1_L         | -0.11                   | 0.31            |
| NAc_R        | A1_R         | 0.13                    | 0.23            |
| NAc_R        | pgACC_L      | -0.16                   | 0.13            |
| NAc_R        | pgACC_R      | 0.02                    | 0.85            |
| NAc_R        | sgACC_L      | 0.11                    | 0.29            |
| NAc_R        | sgACC_R      | -0.04                   | 0.73            |
| NAc_R        | PHC_L        | 0.03                    | 0.80            |
| NAc_R        | PHC_R        | 0.14                    | 0.18            |
| NAc_R        | Amyg_L       | -0.02                   | 0.85            |
| NAc_R        | Amyg_R       | 0.18                    | 0.10            |
| NAc_R        | vmPFC_L      | 0.22                    | 0.04            |
| NAc_R        | vmPFC_R      | 0.13                    | 0.22            |
