# Supplementary material
Source: PubMed Central journal article supplement (PMC6865744)
Supplement: HBM-40-2241-s007.pdf [file HBM-40-2241-s007.pdf]

| Group                      | Region of interest                               | left NAc |          | right NAc |          |
|----------------------------|--------------------------------------------------|----------|----------|-----------|----------|
|                            |                                                  | Z        | pFDR     | Z2        | pFDR2    |
| Frontal                    | Precentral Gyrus (Left)                          | -3.21    | 1.74E-03 | 2.74      | 6.22E-03 |
|                            | Precentral Gyrus (Right)                         | 3.26     | 1.53E-03 | 3.94      | 1.58E-04 |
|                            | Superior Frontal Gyrus (Left)                    | -2.67    | 7.29E-03 | -1.62     | 7.38E-02 |
|                            | Superior Frontal Gyrus (Right)                   | 2.71     | 6.78E-03 | -4.24     | 5.15E-05 |
|                            | Middle Frontal Gyrus (Left)                      | 3.64     | 4.41E-04 | -8.31     | 0.00E+00 |
|                            | Middle Frontal Gyrus (Right)                     | 0.24     | 4.24E-01 | -3.57     | 5.58E-04 |
|                            | Inferior Frontal Gyrus pars Opercularis (Left)   | 1.48     | 9.27E-02 | -8.15     | 5.33E-15 |
|                            | Inferior Frontal Gyrus pars Opercularis (Right)  | -4.45    | 2.06E-05 | 0.51      | 3.39E-01 |
|                            | Inferior Frontal Gyrus pars Triangularis (Left)  | 1.39     | 1.07E-01 | -3.14     | 2.15E-03 |
|                            | Inferior Frontal Gyrus pars Triangularis (Right) | -6.25    | 2.02E-09 | -4.60     | 1.15E-05 |
|                            | Inferior Frontal Gyrus pars Orbitalis (Left)     | 3.23     | 1.65E-03 | 1.54      | 8.44E-02 |
|                            | Inferior Frontal Gyrus pars Orbitalis (Right)    | 4.08     | 9.61E-05 | 2.58      | 9.41E-03 |
|                            | Supplementary Motor Area (Left)                  | -6.88    | 4.13E-11 | -2.22     | 2.23E-02 |
|                            | Supplementary Motor Area (Right)                 | 1.48     | 9.27E-02 | -1.68     | 6.58E-02 |
|                            | Medial Superior Frontal Gyrus (Left)             | 3.19     | 1.83E-03 | -0.91     | 2.14E-01 |
|                            | Medial Superior Frontal Gyrus (Right)            | 0.64     | 3.00E-01 | -6.85     | 4.75E-11 |
|                            | Insula (Left)                                    | -0.30    | 4.06E-01 | -1.87     | 4.63E-02 |
|                            | Insula (Right)                                   | -0.63    | 3.03E-01 | -0.35     | 3.90E-01 |
|                            | Medial Orbital Frontal Gyrus (Left)              | -4.51    | 1.58E-05 | -4.43     | 2.28E-05 |
|                            | Medial Orbital Frontal Gyrus (Right)             | -1.88    | 4.56E-02 | -3.71     | 3.57E-04 |
|                            | Orbitofrontal Cortex, Medial (Left)              | 3.71     | 3.57E-04 | 4.01      | 1.25E-04 |
|                            | Orbitofrontal Cortex, Medial (Right)             | 11.24    | 0.00E+00 | 2.74      | 6.22E-03 |
|                            | Orbitofrontal Cortex, Anterior (Left)            | -0.06    | 4.77E-01 | -2.32     | 1.83E-02 |
|                            | Orbitofrontal Cortex, Anterior (Right)           | 3.77     | 2.90E-04 | 5.90      | 1.39E-08 |
|                            | Orbitofrontal Cortex, Posterior (Left)           | 5.80     | 2.54E-08 | 4.15      | 7.67E-05 |
|                            | Orbitofrontal Cortex, Posterior (Right)          | 0.06     | 4.77E-01 | 3.04      | 2.91E-03 |
|                            | Orbitofrontal Cortex, Lateral (Left)             | 0.13     | 4.57E-01 | -0.50     | 3.40E-01 |
|                            | Orbitofrontal Cortex, Lateral (Right)            | 0.77     | 2.54E-01 | 3.82      | 2.47E-04 |
|                            | Rectus (Left)                                    | 1.91     | 4.30E-02 | 2.05      | 3.27E-02 |
|                            | Rectus (Right)                                   | 4.53     | 1.54E-05 | 3.15      | 2.08E-03 |
|                            | Olfactory Gyrus (Left)                           | -10.42   | 0.00E+00 | -4.12     | 8.43E-05 |
|                            | Olfactory Gyrus (Right)                          | 1.72     | 6.12E-02 | 1.14      | 1.55E-01 |
| Rolandic Operculum (Left)  | -2.25                                            | 2.11E-02 | -3.95    | 1.58E-04  |          |
| Rolandic Operculum (Right) | -0.99                                            | 1.90E-01 | -3.52    | 6.43E-04  |          |
| Cingulate                  | Cingulate Cortex, Anterior (Left)                | -3.62    | 4.62E-04 | -2.40     | 1.50E-02 |
|                            | Cingulate Cortex, Anterior (Right)               | -6.36    | 1.09E-09 | -1.04     | 1.78E-01 |
|                            | Cingulate Cortex, Middle (Left)                  | -5.69    | 4.54E-08 | -5.03     | 1.45E-06 |
|                            | Cingulate Cortex, Middle (Right)                 | 2.99     | 3.38E-03 | -3.51     | 6.55E-04 |
|                            | Cingulate Cortex, Posterior (Left)               | -3.03    | 2.94E-03 | -2.89     | 4.33E-03 |
|                            | Cingulate Cortex, Posterior (Right)              | -3.42    | 9.01E-04 | -3.84     | 2.34E-04 |
| Temporal                   | Temporal Cortex, Superior (Left)                 | 3.93     | 1.64E-04 | 2.47      | 1.26E-02 |
|                            | Temporal Cortex, Superior (Right)                | -3.10    | 2.43E-03 | 3.35      | 1.14E-03 |
|                            | Temporal Cortex, Middle (Left)                   | 0.38     | 3.80E-01 | 3.18      | 1.86E-03 |
|                            | Temporal Cortex, Middle (Right)                  | -1.91    | 4.33E-02 | -1.32     | 1.19E-01 |
|                            | Temporal Cortex, Inferior (Left)                 | 2.71     | 6.82E-03 | 4.35      | 3.13E-05 |

|             |                                    |       |          |        |          |
|-------------|------------------------------------|-------|----------|--------|----------|
|             | Temporal Cortex, Inferior (Right)  | 2.74  | 6.22E-03 | 7.25   | 3.25E-12 |
|             | Temporal Pole, Superior (Left)     | 2.96  | 3.63E-03 | -1.66  | 6.85E-02 |
|             | Temporal Pole, Superior (Right)    | 2.32  | 1.83E-02 | 0.00   | 4.99E-01 |
|             | Temporal Pole, Middle (Left)       | -1.86 | 4.67E-02 | -3.29  | 1.38E-03 |
|             | Temporal Pole, Middle (Right)      | 1.54  | 8.43E-02 | -2.40  | 1.50E-02 |
|             | Heschls Gyrus (Left)               | 2.18  | 2.47E-02 | -8.48  | 0.00E+00 |
|             | Heschls Gyrus (Right)              | 1.43  | 9.91E-02 | 0.83   | 2.34E-01 |
|             | Fusiform Gyrus (Left)              | -9.72 | 0.00E+00 | -2.20  | 2.35E-02 |
|             | Fusiform Gyrus (Right)             | -5.05 | 1.37E-06 | -9.36  | 0.00E+00 |
|             | Hippocampus (Left)                 | -1.93 | 4.16E-02 | -4.12  | 8.43E-05 |
|             | Hippocampus (Right)                | -5.73 | 3.55E-08 | -7.05  | 1.36E-11 |
|             | Parahippocampal Gyrus (Left)       | -0.60 | 3.07E-01 | -3.22  | 1.68E-03 |
|             | Parahippocampal Gyrus (Right)      | -5.39 | 2.35E-07 | -7.57  | 3.57E-13 |
| Parietal    | Postcentral Gyrus (Left)           | -0.61 | 3.06E-01 | 2.74   | 6.22E-03 |
|             | PostCentral Gyrus (Right)          | 1.77  | 5.60E-02 | 3.56   | 5.58E-04 |
|             | Parietal Cortex, Superior (Left)   | -0.07 | 4.77E-01 | 0.46   | 3.55E-01 |
|             | Parietal Cortex, Superior (Right)  | 3.75  | 3.02E-04 | -0.28  | 4.10E-01 |
|             | Parietal Cortex, Inferior (Left)   | 5.09  | 1.14E-06 | -6.01  | 7.65E-09 |
|             | Parietal Cortex, Inferior (Right)  | 1.91  | 4.33E-02 | -2.47  | 1.26E-02 |
|             | Supramarginal Gyrus (Left)         | -0.15 | 4.56E-01 | 4.01   | 1.25E-04 |
|             | Supramarginal Gyrus (Right)        | -4.76 | 5.30E-06 | 2.98   | 3.43E-03 |
|             | Angular Gyrus (Left)               | -2.79 | 5.59E-03 | -1.61  | 7.54E-02 |
|             | Angular Gyrus (Right)              | 1.46  | 9.53E-02 | 2.67   | 7.30E-03 |
|             | Precuneus (Left)                   | 0.32  | 4.01E-01 | 0.40   | 3.76E-01 |
|             | Precuneus (Right)                  | -1.04 | 1.78E-01 | -7.61  | 2.84E-13 |
|             | Paracentral Lobule (Left)          | 2.39  | 1.52E-02 | 0.36   | 3.87E-01 |
|             | Paracentral Lobule (Right)         | 2.27  | 2.03E-02 | -0.14  | 4.57E-01 |
| Subcortical | Thalamus (Left)                    | -2.75 | 6.22E-03 | -6.09  | 4.98E-09 |
|             | Thalamus (Right)                   | -7.43 | 9.61E-13 | -1.23  | 1.36E-01 |
|             | Caudate (Left)                     | -0.85 | 2.31E-01 | -1.54  | 8.44E-02 |
|             | Caudate (Right)                    | 1.52  | 8.65E-02 | -2.87  | 4.49E-03 |
|             | Putamen (Left)                     | -1.64 | 7.07E-02 | -3.70  | 3.64E-04 |
|             | Putamen (Right)                    | -5.12 | 1.00E-06 | -6.90  | 3.55E-11 |
|             | Pallidum (Left)                    | -1.00 | 1.88E-01 | -1.08  | 1.69E-01 |
|             | Pallidum (Right)                   | -5.00 | 1.67E-06 | -2.26  | 2.09E-02 |
|             | Amygdala (Left)                    | 2.89  | 4.33E-03 | -2.36  | 1.63E-02 |
|             | Amygdala (Right)                   | -6.31 | 1.47E-09 | -16.00 | 0.00E+00 |
| Occipital   | Occipital Cortex, Superior (Left)  | -2.81 | 5.31E-03 | 1.05   | 1.76E-01 |
|             | Occipital Cortex, Superior (Right) | -6.50 | 4.61E-10 | 1.58   | 7.96E-02 |
|             | Occipital Cortex, Middle (Left)    | -2.02 | 3.51E-02 | -1.07  | 1.72E-01 |
|             | Occipital Cortex, Middle (Right)   | -4.97 | 1.93E-06 | -0.24  | 4.24E-01 |
|             | Occipital Cortex, Inferior (Left)  | -1.29 | 1.25E-01 | -0.44  | 3.58E-01 |
|             | Occipital Cortex, Inferior (Right) | -2.57 | 9.67E-03 | 6.04   | 6.70E-09 |
|             | Calcarine Gyrus (Left)             | 0.21  | 4.32E-01 | -2.95  | 3.67E-03 |
|             | Calcarine Gyrus (Right)            | -1.36 | 1.11E-01 | -2.82  | 5.20E-03 |
|             | Cuneus (Left)                      | 1.78  | 5.52E-02 | 1.97   | 3.83E-02 |
|             | Cuneus (Right)                     | -4.06 | 1.02E-04 | 3.55   | 5.72E-04 |

|            |                            |       |          |        |          |
|------------|----------------------------|-------|----------|--------|----------|
|            | Lingual Gyrus (Left)       | 1.56  | 8.17E-02 | 1.51   | 8.75E-02 |
|            | Lingual Gyrus (Right)      | -1.74 | 5.93E-02 | -1.30  | 1.21E-01 |
| Cerebellar | Cerebellum Crus I (Left)   | 4.59  | 1.18E-05 | 1.44   | 9.84E-02 |
|            | Cerebellum Crus I (Right)  | -0.14 | 4.56E-01 | -10.88 | 0.00E+00 |
|            | Cerebellum Crus II (Left)  | 0.21  | 4.32E-01 | -4.89  | 2.78E-06 |
|            | Cerebellum Crus II (Right) | -2.68 | 7.24E-03 | -7.73  | 1.19E-13 |
|            | Cerebellum III (Left)      | 2.87  | 4.57E-03 | -2.05  | 3.28E-02 |
|            | Cerebellum III (Right)     | 2.13  | 2.72E-02 | -3.63  | 4.50E-04 |
|            | Cerebellum IV, V (Left)    | 1.19  | 1.43E-01 | -3.67  | 3.97E-04 |
|            | Cerebellum IV, V (Right)   | 0.62  | 3.03E-01 | -1.14  | 1.56E-01 |
|            | Cerebellum VI (Left)       | 3.84  | 2.34E-04 | 1.99   | 3.67E-02 |
|            | Cerebellum VI (Right)      | 0.62  | 3.03E-01 | -6.27  | 1.81E-09 |
|            | Cerebellum VIIb (Left)     | 1.31  | 1.20E-01 | 2.70   | 6.90E-03 |
|            | Cerebellum VIIb (Right)    | -1.21 | 1.41E-01 | -6.66  | 1.68E-10 |
|            | Cerebellum VIII (Left)     | -2.29 | 1.96E-02 | -0.46  | 3.55E-01 |
|            | Cerebellum VIII (Right)    | -2.90 | 4.33E-03 | -0.52  | 3.37E-01 |
|            | Cerebellum IX (Left)       | -3.56 | 5.58E-04 | -9.39  | 0.00E+00 |
|            | Cerebellum IX (Right)      | -2.78 | 5.69E-03 | 1.83   | 5.01E-02 |
|            | Cerebellum X (Left)        | -5.90 | 1.39E-08 | -3.42  | 9.03E-04 |
|            | Cerebellum X (Right)       | 3.21  | 1.74E-03 | -2.43  | 1.42E-02 |
|            | Vermis I, II               | -1.77 | 5.59E-02 | -5.31  | 3.60E-07 |
|            | Vermis III                 | -2.22 | 2.23E-02 | -2.15  | 2.59E-02 |
|            | Vermis IV, V               | -2.20 | 2.34E-02 | -3.37  | 1.05E-03 |
|            | Vermis VI                  | -1.46 | 9.54E-02 | -2.88  | 4.43E-03 |
|            | Vermis VII                 | -1.26 | 1.30E-01 | 1.90   | 4.38E-02 |
|            | Vermis VIII                | 1.99  | 3.67E-02 | 2.06   | 3.23E-02 |
|            | Vermis IX                  | -0.11 | 4.62E-01 | -3.81  | 2.55E-04 |
|            | Vermis X                   | -6.18 | 2.95E-09 | -3.76  | 2.97E-04 |
